# Supplementary material for: Interleukin 4 Controls the Pro-Tumoral Role of Macrophages in Mammary Cancer Pulmonary Metastasis in Mice
Source: Cancers (Basel). 2022 Sep 5;14(17):4336. doi: 10.3390/cancers14174336 (PMC9454655; doi:10.3390/cancers14174336)
Supplement: Supplementary file 1 [file cancers-14-04336-s001.zip]

Archive with 4 entries (4 files):
- Rodriguez-Tirado et al - Movie 1 - Suppl for Fig3A.avi
- Rodriguez-Tirado et al - Movie 2 - Suppl for Fig3B.avi
- Rodriguez-Tirado et al - Movie 3 - Suppl for Fig3C.avi
- Supplementary Figures.pdf
